# Supplementary material for: Poly(Hydroxyethyl Methacrylate) Immunoaffinity Cryogel Column for the Purification of Human Immunoglobulin M
Source: PubMed Central journal article supplement (PMC7151037; doi:10.3390/gels6010004), 2020-01-29
Supplement: gels-06-00004-s001.pdf [file gels-06-00004-s001.pdf]

## Supplementary

### Poly(Hydroxyethyl Methacrylate) Immunoaffinity Cryogel Column for Purification of Human Immunoglobulin M

Monireh Bakhshpour <sup>1</sup>, Aykut Arif Topcu <sup>2</sup>, Nilay Bereli <sup>1</sup>, Huseyin Alkan <sup>3</sup> and Adil Denizli <sup>1,\*</sup>

<sup>1</sup> Department of Chemistry, Biochemistry Division, Hacettepe University, Ankara, Turkey

<sup>2</sup> Department of Chemistry, Aksaray University, Aksaray, Turkey

<sup>3</sup> Department of Chemistry, Dicle University, Diyarbakır, Turkey

\* Correspondence: [denizli@hacettepe.edu.tr](mailto:denizli@hacettepe.edu.tr); Tel.: +90 312 299 2163

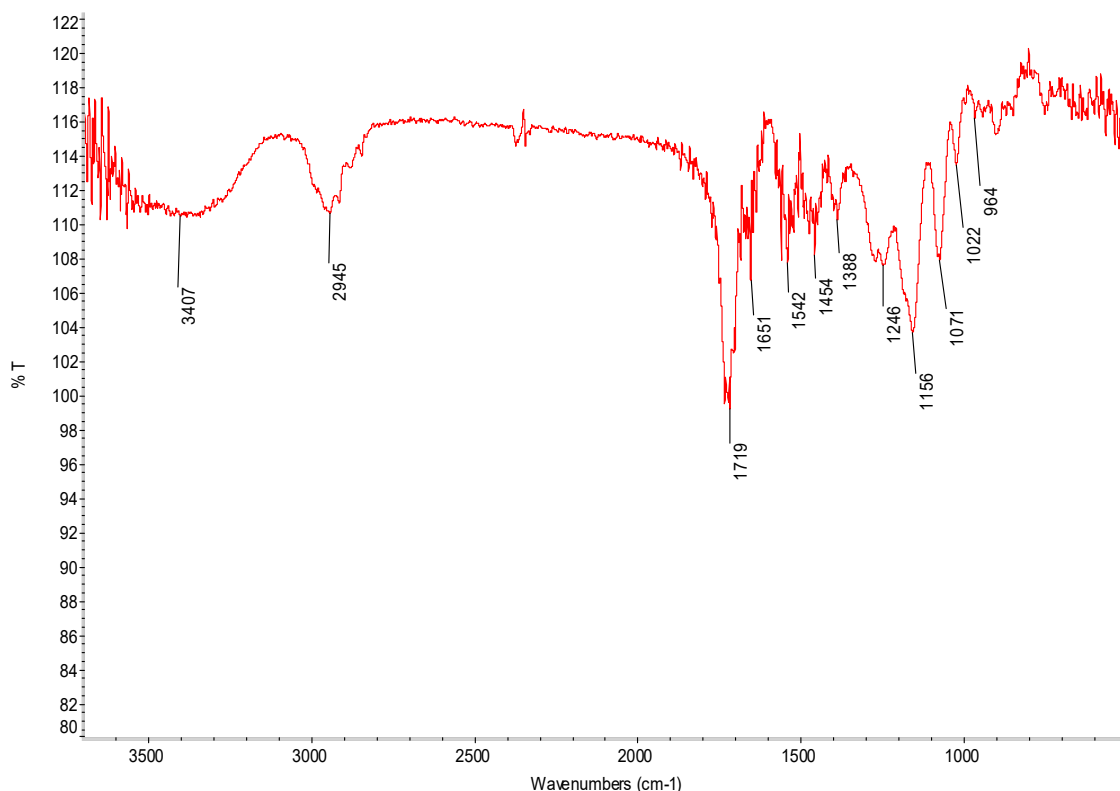

The FTIR spectrum of the p(HEMA) cryogel column, which have described as -OH stretching around 3407 cm<sup>-1</sup>, aliphatic -CH stretching around 2945 cm<sup>-1</sup>, carbonyl C=O stretching around 1719 cm<sup>-1</sup>, 1156 cm<sup>-1</sup> (C-O stretching), the peaks around at 1651 cm<sup>-1</sup> and 1542 cm<sup>-1</sup> as described amide I (C=O stretching), amide II (C-N stretching), respectively, which were stemmed from cross-linker are the characteristic peaks of p(HEMA). The other peaks, ester bond around 1454 cm<sup>-1</sup>, C-N bond from cross-linker around 1388 cm<sup>-1</sup> and ether bonds around 1246 cm<sup>-1</sup>, 1071 cm<sup>-1</sup>, respectively. FTIR results of this work was in accordance with previous studies [42,43].

## References

42. Attieh-Daoud, M; Chaib, H; Armutcu, C; Uzun, L; Elkak, A; Denizli, A; Immunoglobulin g purification from bovine serum with pseudo-specific macroporous cryogels. *Sep. Purif. Technol.* 2013, 118, 816-822.
43. Derazshamshir, A; Baydemir, G; Yilmaz, F; Bereli, N; Denizli, A. Preparation of cryogel columns for depletion of hemoglobin from human blood. *Artif. Cell. Nanomed. B.* 2016, 44, 3, 792-799.
